# Supplementary material for: The temporal variability of Io’s hotspots
Source: Frontiers journal article supplement (doi:10.3389/fspas.2024.1369472), 2024-05-20
Supplement: Table_1.docx [file Table_1.docx]

**Supplementary Table S1.** *Database of JIRAM, including the number of observations in the two bands, and saturation fraction. In orbits 41 and 47 Loki is saturating, but that is not considered in this table since Loki is almost at the limb in those observations.*

| *Juno’s orbit* | *Number of  L-band images* | *Number of  M-band images* | *Saturation (%)* |
| --- | --- | --- | --- |
| *5* | *0* | *53* | *54* |
| *6* | *0* | *360* | *15* |
| *9* | *0* | *61* | *9* |
| *10* | *0* | *44* | *18* |
| *11* | *0* | *21* | *11* |
| *16* | *0* | *230* | *32* |
| *17* | *0* | *29* | *18* |
| *18* | *0* | *27* | *14* |
| *20* | *0* | *25* | *23* |
| *24* | *13* | *45* | *8* |
| *25* | *19* | *41* | *28* |
| *26* | *11* | *8* | *14* |
| *27* | *6* | *144* | *8* |
| *32* | *15* | *120* | *8* |
| *33* | *29* | *164* | *18* |
| *35* | *45* | *258* | *6* |
| *37* | *16* | *76* | *6* |
| *40* | *0* | *154* | *11* |
| *41* | *11* | *12* | *0* |
| *43* | *8* | *10* | *1* |
| *47* | *11* | *12* | *1* |
| *49* | *8* | *10* | *1* |
